# Supplementary material for: Multi-Technique Approach to Enhance the Properties of Fine Recycled Aggregate Concrete
Source: Frontiers journal article supplement (doi:10.3389/fmats.2022.893852), 2022-06-08
Supplement: Table_2.XLSX [file Table_2.XLSX]

## Sheet: Compressive strength 
		FRA %			3 Days					28 days					180 days
				Mix	Compressive strength (MPa)			Standard dev.	Av. Strength (MPa)	Compressive strength (MPa)			Standard dev.	Av. Strength (MPa)	Compressive strength (MPa)			Standard dev.	Av. Strength (MPa)
			w/b		Sample 1	Sample 2	Sample 3			Sample 1	Sample 2	Sample 3			Sample 1	Sample 2	Sample 3
		0	0.55	A-0-P	34.4	36.3	36.7	1.22882	35.8	46.94	43.52	45.55	1.71995	45.3367	50.05	51.36	49.81	0.834286	50.4067
				A-0-F	23.2	24.9	23.8	0.862168	23.9667	41.71	41.86	40.97	0.47648	41.5133	62	58.71	57.99	2.13786	59.5667
		0.25		A1-25-P	36.7	38.4	36.4	1.07858	37.1667	48.2	48	49.1	0.585947	48.4333	60.36	61.12	60.32	0.450777	60.6
				A1-25-F	23.7	24	23.7	0.173205	23.8	39.5	39.8	37.4	1.30767	38.9	63.53	62.7	62.49	0.549939	62.9067
				A2-25-P	29.6	32.7	32.4	1.70978	31.5667	40.1	43.7	41.4	1.823	41.7333	52.96	52.55	54.36	0.949052	53.29
				A2-25-F	22	21	21.7	0.51316	21.5667	38.75	39.22	41.16	1.27754	39.71	58.99	56.93	56.58	1.30219	57.5
		0.5		A1-50-P	33	33.8	33.6	0.416333	33.4667	42.2	46.9	44.9	2.35867	44.6667	50.84	54.66	51.87	1.97642	52.4567
				A1-50-F	22.1	22.3	22.9	0.416333	22.4333	41	38	39.5	1.5	39.5	63.38	66.25	65.46	1.48253	65.03
				A2-50-P	30.8	31.7	28.8	1.48436	30.4333	43.04	43.58	40.01	1.92429	42.21	47.31	48.29	47.03	0.661614	47.5433
				A2-50-F	19.3	20.6	20.7	0.781025	20.2	39.63	39.71	38.57	0.636344	39.3033	53.53	54.46		0.657609	53.995
			0.45
		0		B-0-P	43.5	42.1	45.5	1.7088	43.7	59.36	56.1	54.96	2.28354	56.8067	66.91	63.7	62.9	2.12227	64.5033
				B-0-F	37.18	36.58	36.1	0.54111	36.62	55.27	57.65	57.22	1.26832	56.7133	78.69	76.88	73.78	2.48308	76.45
		0.25		B1-25-P	43.4	42.3	41.8	0.818535	42.5	55.72	51.75	53.58	1.98702	53.6833	60.38	59.3	61.33	1.01569	60.3367
				B1-25-F	33.48	35.25	32.98	1.19274	33.9033	52.37	50.13	51.65	1.14356	51.3833	69.13	66.3	66.96	1.48062	67.4633
				B2-25-P	47.55	47.16	45.54	1.06588	46.75	51.85	58.88	58	3.8301	56.2433	65.69	69.04	68.04	1.71974	67.59
				B2-25-F	34.87	33.75	33.87	0.614925	34.1633	50.47	53.52	54.01	1.91808	52.6667	65.12	63.12	67.17	2.02505	65.1367
		0.5		B1-50-P	40.3	40.8	41.2	0.450925	40.7667	58.44	57.19	56.8	0.856757	57.4767	68.12	62.18	65.26	2.97068	65.1867
				B1-50-F	32.11	32.04	32.31	0.140119	32.1533	52.28	50.23	52.16	1.15049	51.5567	73.54	70.88	69.9	1.88351	71.44
				B2-50-P	45.74	46.37	48.82	1.62715	46.9767	56.93	59.24	58.08	1.155	58.0833	71.18	71.69	67.28	2.41241	70.05
				B2-50-F	29.12	29.29	30.67	0.850078	29.6933	50.69	48.09	51.24	1.68251	50.0067	62.96	66.39	64.65	1.71506	64.6667

## Sheet: Elastic modulus 
			3 Days					28 days					180 days
	w/b	Mix	Elastic modulus (GPa)					Elastic modulus (GPa)					Elastic modulus (GPa)
			Sample 1	Sample 2	Sample 3	Stand. Dev	Average	Sample 1	Sample 2	Sample 3	Stand. Dev	Average	Sample 1	Sample 2	Sample 3	Stand. Dev	Average
	0.55	A-0-P	38	39.9	40.3	1.22882	39.4	39.2	41.3	41.5	1.2741	40.6667	41.9	42.9	44.5	1.31149	43.1
		A-0-F	34.93	36.53	34.9	0.932541	35.4533	39.2	40.8	38.8	1.0583	39.6	47.3	47	46.8	0.251661	47.0333
		A1-25-P	40.2	38.4	38.7	0.964365	39.1	38.3	40.3	39.8	1.04083	39.4667	41	43.2	41.9	1.10604	42.0333
		A1-25-F	34.44	35.07	34.8	0.31607	34.77	41.3	41.2	40.1	0.665833	40.8667	46.5	46.6	47.1	0.321455	46.7333
		A2-25-P	32.9	34.1	33.5	0.6	33.5	35.34	37.9	35.7	1.38583	36.3133	38.5	40.4	41.2	1.38684	40.0333
		A2-25-F	31.83	32.47	32.4	0.351046	32.2333	36.88	38.59	38.59	0.987269	38.02	44.1	44.3	46	1.04403	44.8
		A1-50-P	35.25	35.95	35.94	0.40129	35.7133	38.98	38.59	36.6	1.27649	38.0567	42	38	39.2	2.05264	39.7333
		A1-50-F	33.7	31.83	32.8	0.935218	32.7767	39.6	39.6	38.7	0.519615	39.3	46.3	45.3	46	0.51316	45.8667
		A2-50-P	31.8	31.2	32.4	0.6	31.8	34.51	32.34	32.67	1.16929	33.1733	34.8	36.1	34.1	1.01489	35
		A2-50-F	29.09	30.73	30.88	0.992992	30.2333	34.5	35.6	33.8	0.907377	34.6333	40.7	42	40.5	0.814453	41.0667
	0.45	B-0-P	41.4	41.66	40.43	0.648254	41.1633	41.4	43.2	42.5	0.907377	42.3667	46.1	47.4	46.8	0.650641	46.7667
		B-0-F	38.4	38.2	39	0.416333	38.5333	42.8	43.4	42.5	0.458258	42.9	49	50.6	49.3	0.85049	49.6333
		B1-25-P	39.72	39.55	39.98	0.216564	39.75	40.9	43	40.8	1.24231	41.5667	44.2	45.8	44	0.986577	44.6667
		B1-25-F	35.8	36.9	36.6	0.568624	36.4333	40.8	40.7	41.2	0.264575	40.9	47.9	46.8	47.4	0.550757	47.3667
		B2-25-P	38.78	37.26	40.66	1.70317	38.9	40.3	39.3	41.5	1.10151	40.3667	44.8	44.5	44.5	0.173205	44.6
		B2-25-F	36.04	35.92	36.04	0.069282	36	40.9	40.3	42.3	1.02632	41.1667	47.4	48.1	48	0.378594	47.8333
		B1-50-P	36.7	39	39.1	1.35769	38.2667	39.1	40.1	40.7	0.80829	39.9667	41.9	43	43	0.635085	42.6333
		B1-50-F	35.2	35.3	35.3	0.057735	35.2667	39.6	40	37.8	1.17189	39.1333	45	45.3	43.3	1.07858	44.5333
		B2-50-P	36.28	37.61	36.03	0.849294	36.64	39	39.4	37.4	1.0583	38.6	41.1	42.8	40.4	1.23423	41.4333
		B2-50-F	35.75	33.76	33.7	1.16663	34.4033	39	39.4	39	0.23094	39.1333	45.3	44.8	45.2	0.264575	45.1
